# Supplementary material
Source: HighWire-hosted journal article supplement (https://bmjopen.bmj.com/content/7/9/e014075)
Supplement: inline-supplementary-material-1 [file inline-supplementary-material-1.pdf]

## Patients' characteristics

| <b>Number</b> | <b>Pseudonym</b> | <b>Country of origin</b> | <b>Medical condition</b> |
|---------------|------------------|--------------------------|--------------------------|
| 1             | Amrani           | Turkey                   | Complicated pneumonia    |
| 2             | Fadila           | Morocco                  | Heart problems           |
| 3             | Norah            | Morocco                  | Complicated pneumonia    |
| 4             | Abdallah         | Morocco                  | Complicated pneumonia    |
| 5             | Zacharia         | Morocco                  | Heart problems           |
| 6             | Bilal            | Algeria                  | Abdominal problems       |
| 7             | Quintus          | Congo                    | Brain haemorrhage        |
| 8             | Onur             | Turkey                   | cancer                   |
| 9             | Kabibe           | Congo                    | Brain haemorrhage        |
| 10            | Ali              | Portugal                 | Severe accident          |
