# Supplementary material
Source: HighWire-hosted journal article supplement (https://bmjopen.bmj.com/content/7/9/e014075)
Supplement: inline-supplementary-material-2 [file inline-supplementary-material-2.pdf]

## **Topic list for formal in-depth interviews**

- Pathology
- Experiences with communication (patient – relatives - intra-team)
  - Difficult communication/disagreements (if applicable)
- Decision making
  - Role - nurse - doctor - patient - relatives
  - Course
  - Difficult communication/disagreements (if applicable)
  - Final medical decision
- Care for patient
  - Positive and negative experiences
- Death of patient
  - Communication with relatives
- Prevention of difficult communication
